# Supplementary material for: The photomorphogenic factors UV-B RECEPTOR 1, ELONGATED HYPOCOTYL 5, and HY5 HOMOLOGUE are part of the UV-B signalling pathway in grapevine and mediate flavonol accumulation in response to the environment
Source: PubMed Central journal article supplement (PMC5049392; doi:10.1093/jxb/erw307), 2016-08-19
Supplement: erw307_suppl_supplementary_figures_s1_12.pdf [file erw307_suppl_supplementary_figures_s1_12.pdf]

## Supplementary Figures

### Figure S1 (next page)

**Phylogenetic analysis of VviUVR1 and UVR8-related proteins from different plant species.** (A) Full-length protein sequence alignment of *Vitis vinifera* UVR1 and its closest homologs from *Arabidopsis thaliana*, *Thellungiella halophila*, *Populus trichocarpa*, *Ricinus communis* and *Physcomitrella patens*. Identical residues are shown in black and conserved residues in dark gray. Regulator of chromosome condensation (RCC1) domains are shown. Tryptophan (W) residues are indicated by asterisks. (B) Neighbor-joining phylogenetic tree of plant UV-B receptor proteins, using UVR8-like proteins from *P. trichocarpa*, *R. communis*, *Glycine max*, *A. thaliana*, *T. halophila*, *P. patens*, *Oryza sativa* and *Brassica rapa*. *A. thaliana* PHYA and PHYB proteins were used as out-groups. Bootstrap values are indicated at each branch. The scale bar represents 0.1 substitutions per site. GenBank accession numbers: VviUVR1 (AGG82479); AtUVR8 (Q9FN03); ThUVR8 (BAJ33982); PtUVR8 (EEE90389); RcUVR8 (EEF39472); PpUVR8 (EDQ78262); BrUVR8 (ABV89658); GmUVR8 (XP\_003526878); OsUVR8 (ABA94217); AtPHYA (AAA21351); AtPHYB (AAR32737). Sequence alignments were performed using MEGA5 software (Tamura *et al.*, 2011) and the MUSCLE algorithm (Edgar, 2004). Phylogenetic trees were constructed with the Neighbor-Joining method in MEGA5. The tree nodes were assessed by bootstrap values generated from 2000 retrials.

**A**

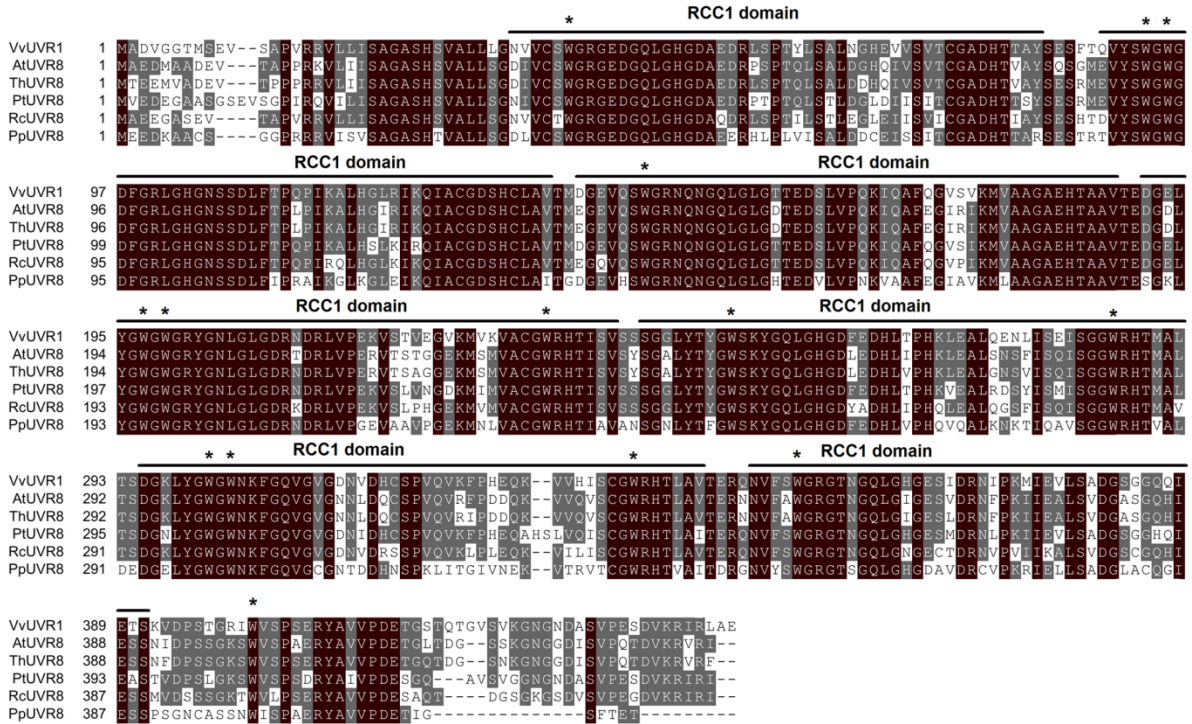

**B**

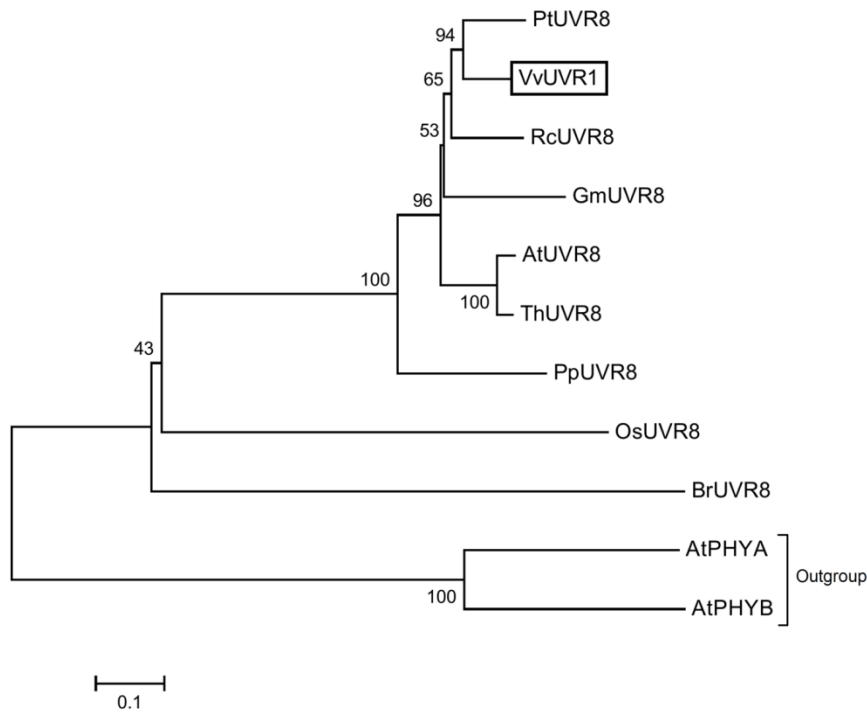

## Figure S2 (next page)

**Phylogenetic relationships between VviHY5, VviHYH and their homologs.** (A) Full-length protein sequence alignment with the closest homologs from *A. thaliana*, *Malus domestica*, *B. rapa*, *Solanum lycopersicum*, *Morus notabilis*, *R. communis* and *P. trichocarpa*. VviHY5 and VviHYH share 36% identity. The two grape proteins possess the conserved bZIP domain, which consists of a basic region mediating sequence-specific DNA-binding followed by a leucine zipper region required for dimerization. Identical residues are shown in black and conserved residues in dark gray. The COP1 interaction site, basic region and leucine zipper region are shown. The COP1-interaction site within motif 1 is preceded by an *in vivo* functional casein kinase II (CKII) phosphorylation site (Oyama *et al.*, 1997; Hardtke *et al.*, 2000). This sequence is formed by a cluster of 4-5 polar amino acids and is highly conserved in HY5 and HYH relatives. In Arabidopsis, these two sites are required for the physical interaction between AtHY5 and AtCOP1 (Holm *et al.*, 2001), an interaction that negatively regulates AtHY5 activity in the absence of light (Osterlund *et al.*, 2000). (B) Phylogenetic tree of different HY5 and HYH proteins from *A. thaliana*, *M. domestica*, *B. rapa*, *S. lycopersicum*, *M. notabilis*, *R. communis*, *P. trichocarpa*, *G. max*, *Pisum sativum*, *O. sativa*, *Z. mays* and *V. vinifera*. RUP1 and RUP2 proteins from *A. thaliana* were used as out-groups. Neighbor-joining tree with bootstrap values out of 2000 retrials. Scale bar represents 0.1 substitutions per site. GenBank accession numbers are: VviHY5 (AGX85877); VviHYH (AHX24181); AtHY5 (BAA21327); AtHYH (NP\_850605); MdbZIP (BAM71071); BrHY5 (ABY83460); MnHY5 (EXC71566); SIHY5 (NP\_001234820); RcHY5 (EEF43212); PtHY5 (EEF00511); GmSTF1 (AAC05017); PsLONG1 (ACP28171); OsHY5 (BAD35451); ZmHY5 (NP\_001147637); AtRUP1 (Q9LTJ6); AtRUP2 (Q9FFA7).

**A**

**COP1 interaction site**

```

VvHY5 1 MQEQATSSLAASSLPSSSSSSSSALQAEVKE-----GMESDEEIRRVPEIISGDPAGPSAIGR
AtHY5 1 MQEQATSSLAASSLPSSSSSSSSAPHLEIKE-----GIESDEEIRRVPEIIG-GEAVGKETSIGR
MdbZIP 1 MQEQATSSLAASSLPSSSSSSSSAPHLEIKE-----GMESDEEIRRVPEIIG-GEATGKEISIGS
BrHY5 1 MQEQATSSLAASSLPSSSSSSSSAPHLEIKE-----GIESDEEIRRVPEIIG-GEATGKEISIGS
MnHY5 1 -----
SiHY5 1 MQEQATSSIAASSLPSSSSSSSSALHHELKE-----GMESDEEIRRVPEIIGGEATGTSAIGR
VvHYH 1 MSLPNTTPSASRSYEQEGSSSSPWRRTADSFPPINIHSNDKHK-----VEDSDEDLFRVFDVEAQPPSDSTRITTT
AtHYH 1 -----MSLQRNGNSSSSSSSKKHKHT-----ESDEELLMVFDMEAAGSTCVLSISA
RcHY5 1 MSLPRTTIFEAAAANATSSSSNWNNKDTLLSHHKS-----LESDDELFTVFDVETRPASVNVNPT
PIHY5 1 MDIGESNNKYPHDHKQLLDDDDDDDDHQQVEGTSATATSSSSSSWRIRRSTGTSNDLISHHKNKLVDHEDSDDELFTVFDVEARPPAAEAAAAA
OsHY5 1 MTIKRKDDGQVVKQSVKAVGGGLLERVDS-----DDEIIVGRVPEIIGLALPGTSTSGRG
  
```

**Basic region** **Leucine zipper region**

```

VvHY5 60 EAAVLVAGPD-----RVQASGDGRKRGRSPADKENKRLKRLLRNRSVSAQQARERKKAYLNELEVRVKDLERKNSLEBERLSTLQENQM
AtHY5 59 ESGSATGQER-----TQATVGESQRKRGRTPADKENKRLKRLLRNRSVSAQQARERKKAYLSELENRVKDLERKNSLEBERLSTLQENQM
MdbZIP 59 ENGLLAGPD-----QVQTAGESQRKRGRNPADKESKRLKRLLRNRSVSAQQARERKKAYLNDLEVRVKDELQKNSELEBERLSTLQENQM
BrHY5 59 GTGQDQT-----QATVGESQRKRGRTPADKETKRLKRLLRNRSVSAQQARERKKAYLGELETRVKDLERKNSLEBERLSTLQENQM
MnHY5 26 DTGSVGGPD-----RVLVAGEGQRKRGRNPADKESKRLKRLLRNRSVSAQQARERKKAYLSDLETRVKDLERKNSLEBERLSTLQENQM
SiHY5 60 DGVSAAG-----QAQPSAGTQRKRGRSPADKENKRLKRLLRNRSVSAQQARERKKAYLIDLEARVKDELTKNSLEBERLSTLQENQM
VvHYH 73 TTTTNTSNNPE-----VQQQTSSGRRRGRNPVDKEYRSLKRLLRNRSVSAQQARERKKAYVYVNDLESRAQELQDRNSKLEBEKISTLQENQM
AtHYH 48 DDGVNPELDQ-----TQNGYSTAKRRRGRNPVDKEYRSLKRLLRNRSVSAQQARERKKAYVYVNDLESRAQELQDRNSKLEBEKISTLQENQM
RcHY5 67 TATINKSPQ-----VLPKERRRGRNPVDKEYRSLKRLLRNRSVSAQQARERKKAYVYVNDLESRAQELQDRNSKLEBEKISTLQENQM
PIHY5 100 GNNTTYYNNKNINSNNPEVQSAAPAAATSNKRHRGRNPVDKEYRSLKRLLRNRSVSAQQARERKKAYVYVNDLESRAQELQDRNSKLEBEKISTLQENQM
OsHY5 55 SVRVAGDAATAAGTSSSPAAQAGVAGSSSSGRKRGRSPADKEHRKRLKRLLRNRSVSAQQARERKKAYMSELEARVKDLERKNSLEBERLSTLQENQM
  
```

```

VvHY5 144 LRHILKNTTASRRGG----SSNNSNADGSL-----
AtHY5 144 LRHILKNTTGNKRG----GGGGSNADASL-----
MdbZIP 143 LRHILKNTTASRRG----ADGGANAD-----
BrHY5 141 LRQILKNTTGNKRRGG----GGGGSNADASL-----
MnHY5 110 LRHVCPSLSIFASSSSSYARNRTSIHASSSISGQYVICISVLSGPIGGTVQPS
SiHY5 142 LRHILKNTTAGAQEG----RK-----
VvHYH 160 LRKVMNTRPKMDDSTESKHDQLGKS-----
AtHYH 134 LRKMLINTRPKTDDNH-----
RcHY5 147 LRKVMNTRPKVDQSIDAKHDQLGNS-----
PIHY5 199 LRKVMNTRPKVDESMEQKQ-----
OsHY5 154 LRQVLEKNTTANRRGPDSAGGDS-----
  
```

**B**

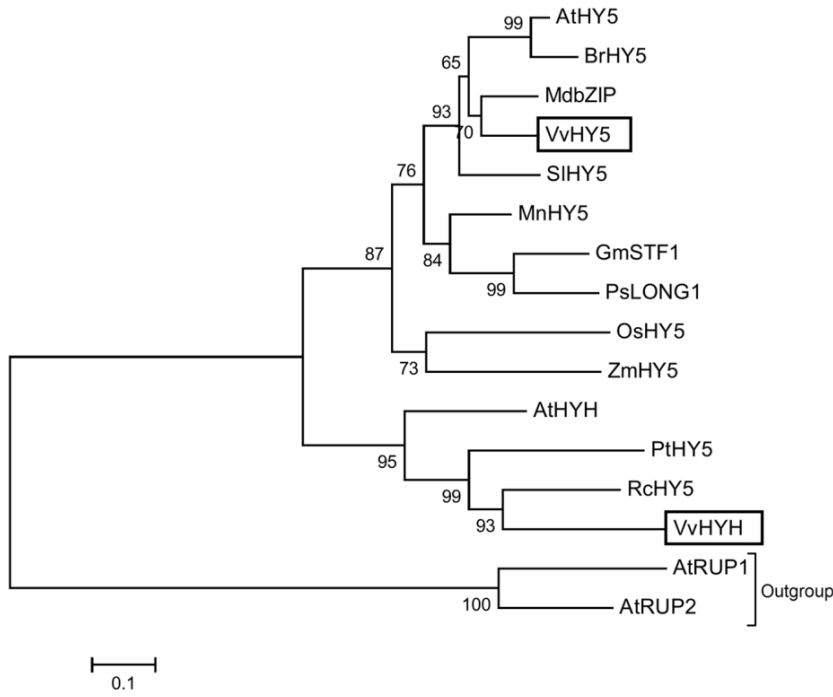

**Figure S3**

RT-PCR detection of the *VviUVR1* (A) and *VviHY5* (B) transgenes in *Arabidopsis uvr8-6* and *hy5-215* complemented lines, respectively. *AtACTIN2* was used as a control for cDNA integrity. Wt: wild type Col-0 plants. #: number of independent transgenic line.

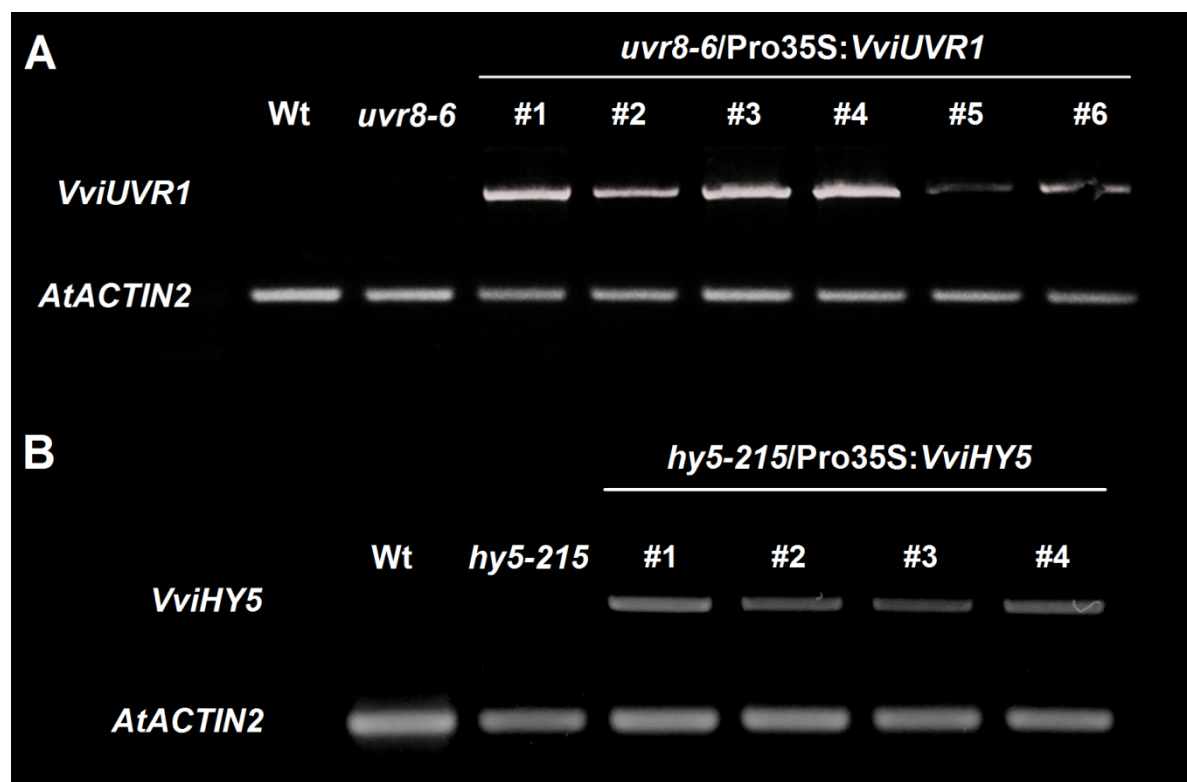

Figure S4

**Hypocotyl length and flavonol accumulation in *uvr8-6* and *hy5-215* complemented lines under dark conditions.** (A-D) Hypocotyl length in Wt (Col-0), *uvr8-6* mutant, *hy5-215* mutant, and *UVR1* or *HY5* complemented lines. (E-F) Total flavonol accumulation in six-day-old seedlings grown under continuous dark. Error bars represent the standard deviation (SD, n=6 plates with 15 seedlings each). Statistical analysis didn't show any difference between genotypes.

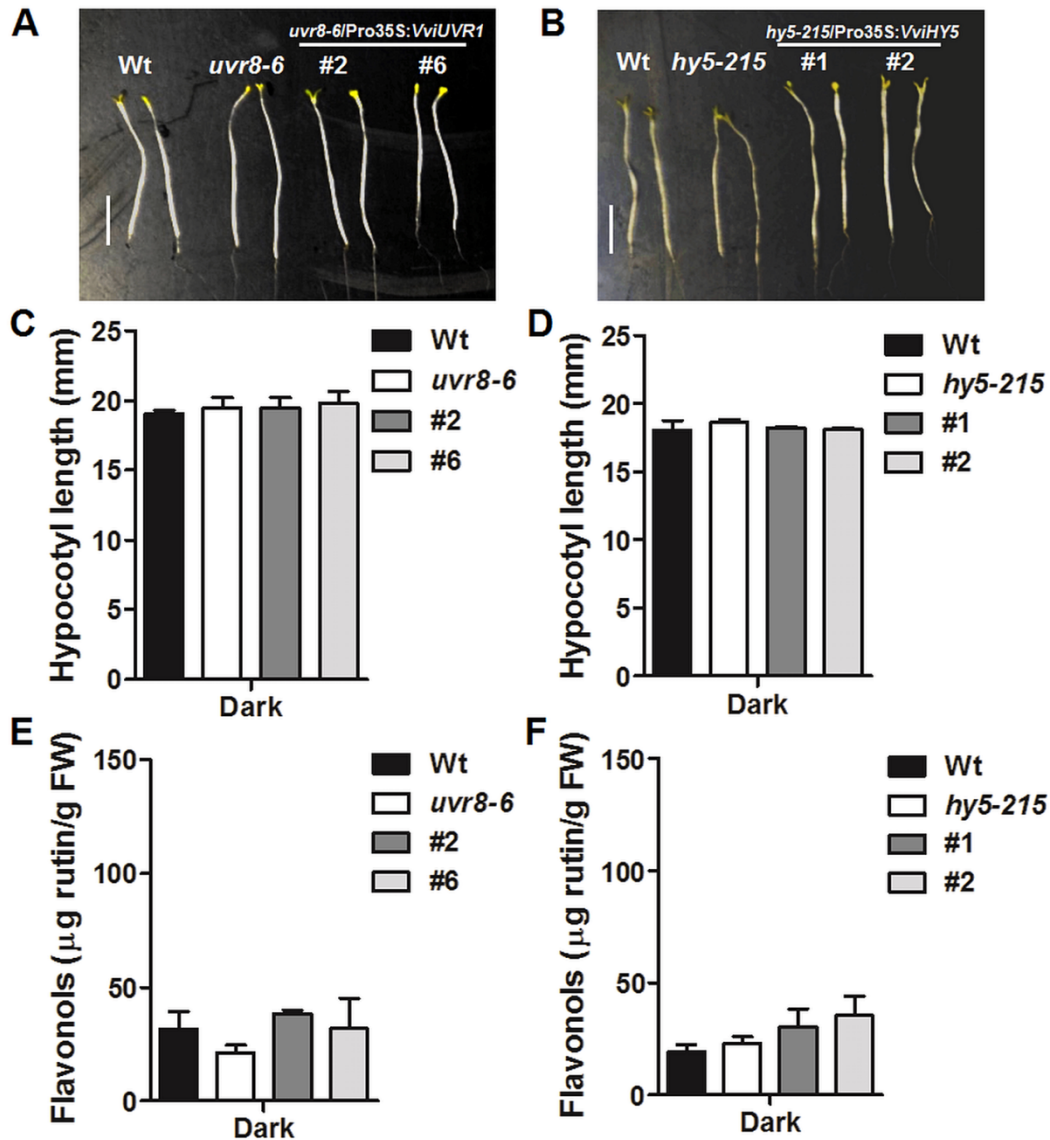

**Figure S5**

**Expression profiles of *UVR1*, *HY5* and *HYH* in grapevine organs of cv. Corvina.** The expression profiles of *UVR1*, *HY5* and *HYH* were assessed in the global *V. vinifera* cv. Corvina (clone 48) gene expression atlas (Nimblegen platform) of different organs at various developmental stages. The fluorescence intensity values of each transcript in all organs were calculated as log2 and normalized, based on the mean expression value of each gene in all organs. The colour scale bar represents expression levels with respect to the mean value. Abbreviations after organ names indicate the developmental stage. FS, fruit set; PFS, post fruit set; V, veraison; MR, mid-ripening; R, ripening; PHWI, post-harvest withering (1st month); PHWII, post-harvest withering (2nd month); PHWIII, post-harvest withering (3rd month), Bud - L, latent bud; Bud - W, winter bud; Bud - S, bud swell; Bud - B, bud burst; Bud - AB, bud after burst; Inflorescence - Y, young inflorescence with single flowers separated; Inflorescence - WD, well developed inflorescence; Flower - FB, flowering begins; Flower - F, flowering; Tendril - Y, young tendril; Tendril - WD, well developed tendril; Tendril - FS, mature tendril; Leaf - Y, young leaf; Leaf - FS, mature leaf; Leaf - S, senescing leaf; Stem - G, green stem; Stem - W, woody stem.

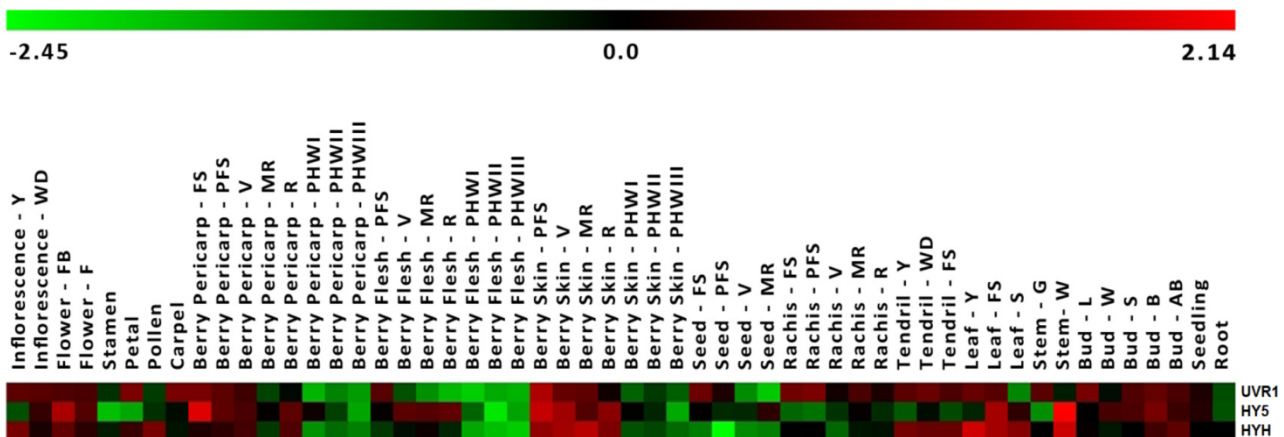

**Figure S6**

**Summary of enriched gene ontology (GO) biological process (BP) terms from *HY5* and *HYH* gene co-expression networks.** Enrichments, expressed as  $-\log_{10}(\text{FDR})$  for each category are represented in a heatmap of colours in red (with varying intensities) and white, representing enriched and non-enriched categories for each GCN.

|                                       | HY5   |          | HYH   |          |
|---------------------------------------|-------|----------|-------|----------|
|                                       | Atlas | Stress** | Atlas | Stress** |
| biological_process                    | 1     | 1        | 1     | 1        |
| biosynthetic process                  | 0     | 0        | 1     | 0        |
| carbohydrate metabolic process        | 1     | 0        | 1     | 1        |
| cellular component organization       | 1     | 0        | 9     | 9        |
| cellular homeostasis                  | 0     | 0        | 1     | 0        |
| cellular process                      | 0     | 1        | 1     | 0        |
| cellular protein modification process | 1     | 0        | 1     | 0        |
| generation of metabolites and energy  | 1     | 0        | 9     | 1        |
| lipid metabolic process               | 1     | 0        | 9     | 1        |
| metabolic process                     | 1     | 1        | 9     | 1        |
| multicellular organism development    | 0     | 0        | 1     | 1        |
| nucleobase metabolic process          | 1     | 0        | 9     | 1        |
| photosynthesis                        | 1     | 0        | 9     | 9        |
| pollen-pistil interaction             | 0     | 0        | 1     | 0        |
| reproduction                          | 0     | 0        | 1     | 0        |
| response to abiotic stimulus          | 0     | 1        | 9     | 1        |
| response to biotic stimulus           | 0     | 0        | 1     | 0        |
| response to external stimulus         | 0     | 0        | 1     | 0        |
| response to stress                    | 0     | 1        | 1     | 0        |
| secondary metabolic process           | 0     | 0        | 1     | 0        |
| translation                           | 0     | 0        | 1     | 0        |
| transport                             | 0     | 0        | 1     | 1        |

$-\log_{10}(\text{P-value})$

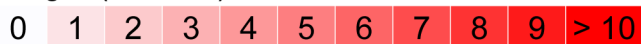



**Figure S7**

**Genome-wide analysis of predicted HY5 and UV-B response cis-regulatory elements (CRE) in 29,839 random promoters sequences.** (A) Distribution plots of HY5 and UV-B response CRE in random simulated promoter sequences. Each bin represents the total motif occurrence in 50 promoter bases, adjusted for the baseline occurrence. The baselines of C-box, C/A-box, C/G-box, E-box, and T/G-box in random simulated promoters are 316, 646, 313, 482, and 238, respectively. (B) Fold-enrichment of grapevine genes containing the CRE (Obs) compared to those identified in random simulated promoters (Exp) based on averages of 100 permutation observations.

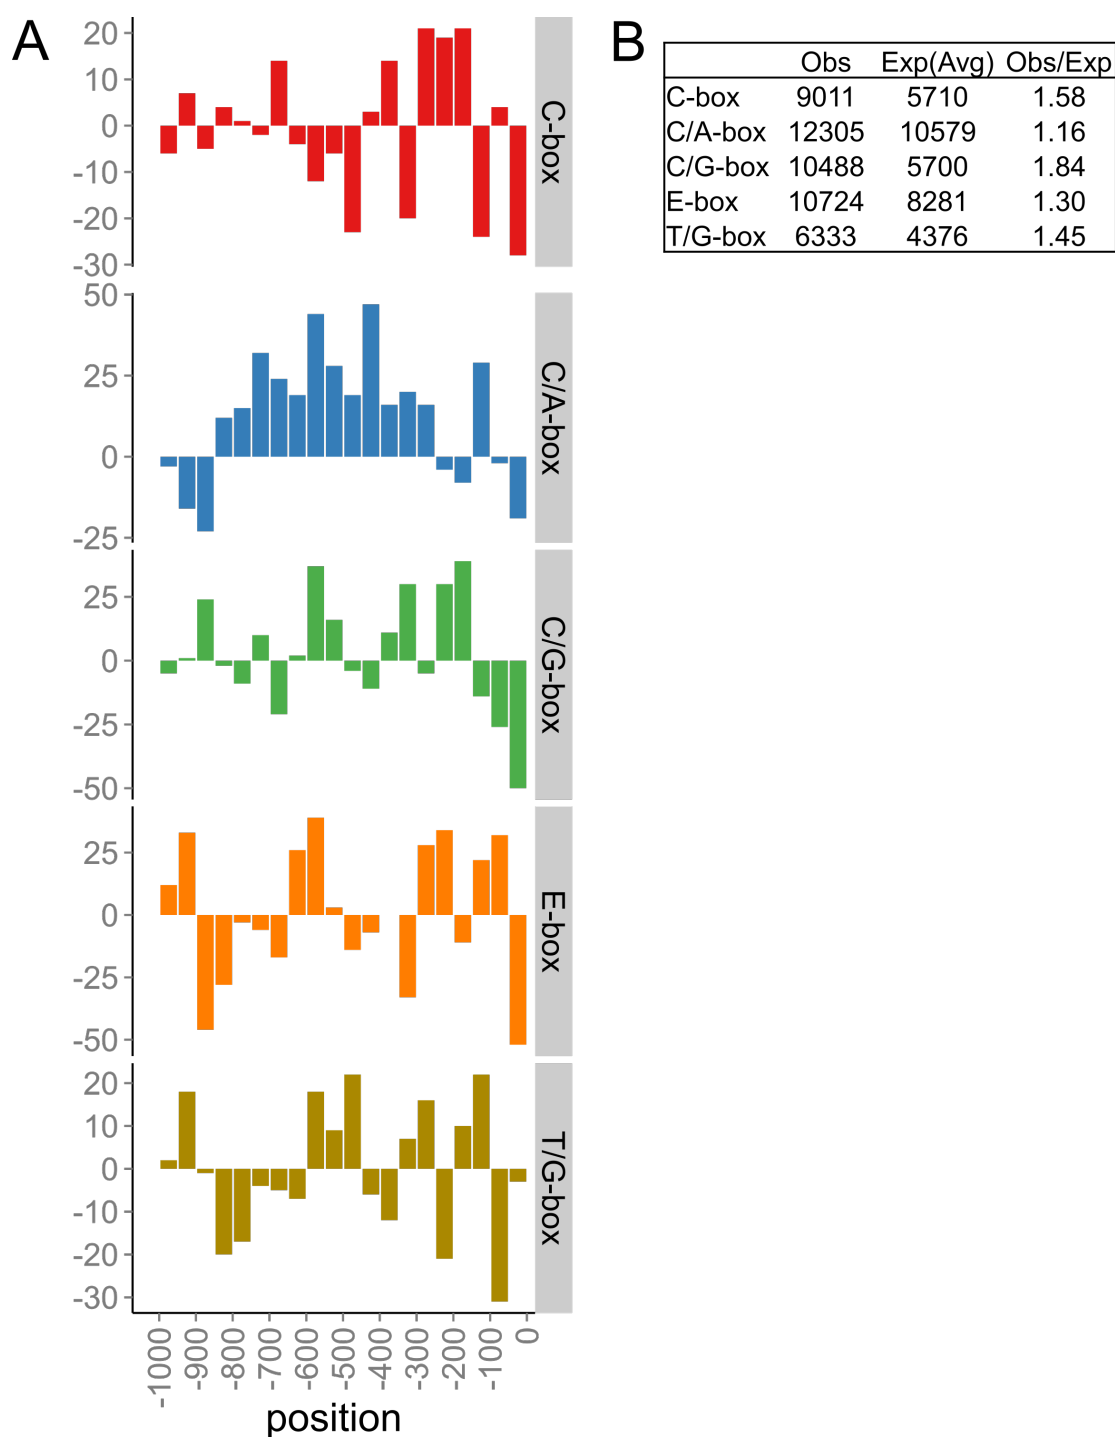

## Figure S8

**Relationships between grapevine photolyases and cryptochrome related flavoproteins.** (A) The light-harvesting cofactor binding domain (cdd: pfam00875) was used in a search for all putative cryptochrome and photolyase flavoproteins in the grapevine 12Xv1 genome prediction. (B) Phylogenetic relationships between Arabidopsis and grapevine CRY-like flavoproteins. The blue-light photoreceptors PHOTOTROPIN 1 and 2 were used as outgroups.

**A**

| Gene   | Gene model 12X V1 | Identities   | Id % | Exp    | Description                                              |
|--------|-------------------|--------------|------|--------|----------------------------------------------------------|
| CRY1   | VIT_18s0001g05680 | 74/166 (160) | 44   | 8e-30, | Cryptochrome 1                                           |
| CRY2   | VIT_05s0049g00960 | 64/166 (160) | 38   | 1e-25, | Cryptochrome 2                                           |
| FOT6-4 | VIT_09s0002g05990 | 63/147 (160) | 42   | 2e-24, | 6-4 photolyase (UVR3-like)                               |
| FOT2   | VIT_07s0005g00590 | 52/128 (160) | 40   | 6e-22, | Deoxyribodipyrimidine photolyase                         |
| CRYD   | VIT_04s0008g02670 | 47/120 (160) | 39   | 8e-17, | Cryptochrome DASH                                        |
| FOT3   | VIT_16s0022g01340 | 37/115 (160) | 32   | 5e-11, | Deoxyribodipyrimidine photolyase                         |
| FOT1   | VIT_02s0241g00040 | 44/138 (160) | 31   | 3e-05, | Cyclobutane pyrimidine dimer photolyase (PHR1/UVR2-like) |

**B**

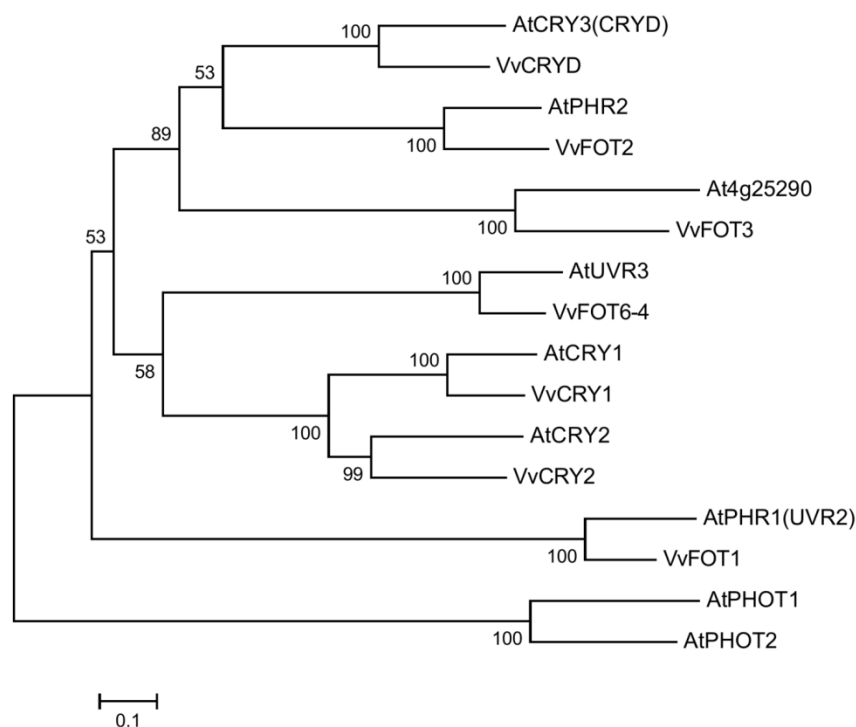

## Figure S9

**Experimental setup of *in-vitro* plantlets exposed to low fluence UV-B radiation (Cavallini *et al.*, 2015). (A) Tubes were covered with cellulose acetate filters that do not remove any UV-B radiation but exclude wavelengths lower than 280 nm. Percentage of PAR (B) and UV-B radiation (C) absorbed by 100  $\mu\text{m}$  clear polyester film (PE film) (gray) used in -UV-B treatment.**

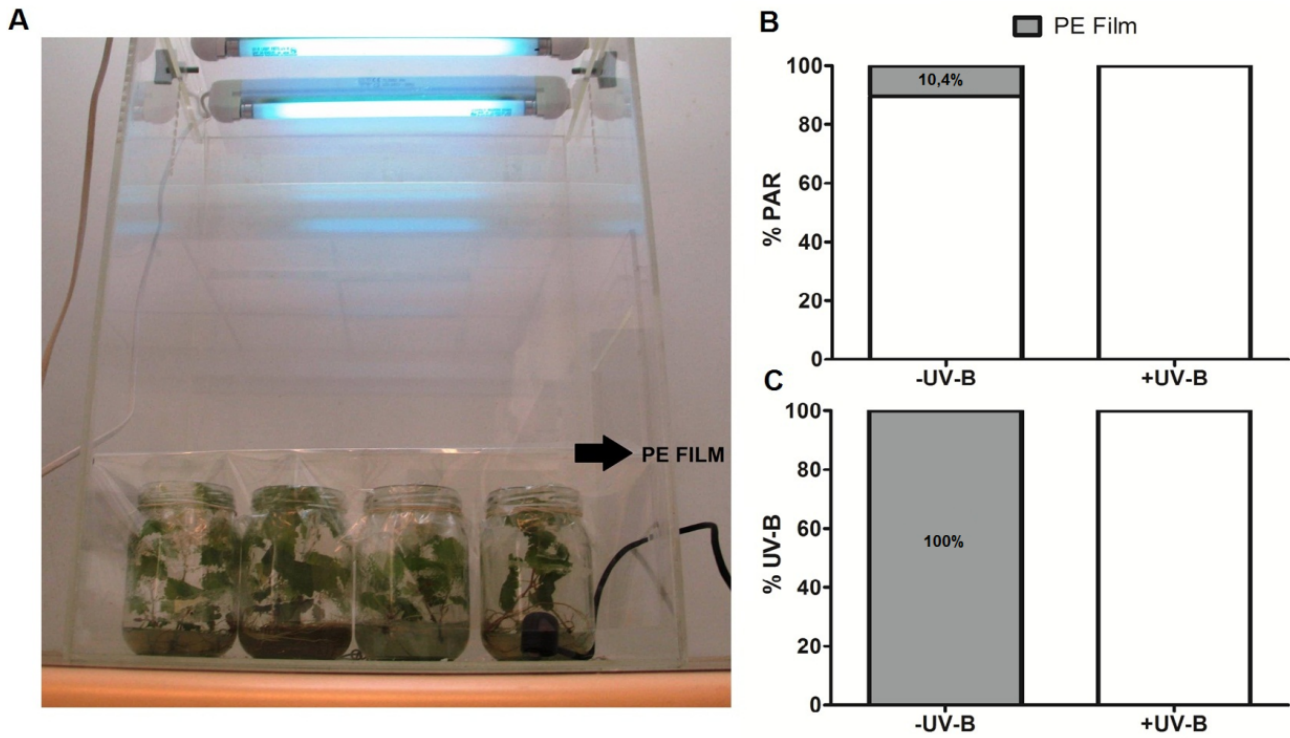

**Figure S10**

**Up-regulation of *HY5*, *HYH* and the flavonol related *MYBF1* and *FLS4* genes in UV-B treated grapevine stem cuttings.** Stem cuttings with fully developed leaves were transferred to 4% UV-B and 30% UV-A light (18 W, 6500 K) radiation conditions (+). The control corresponds to cuttings not supplemented with UV-B (-). Vertical bars indicate the standard deviations (n=9) and asterisks refer to statistically significant expression changes.

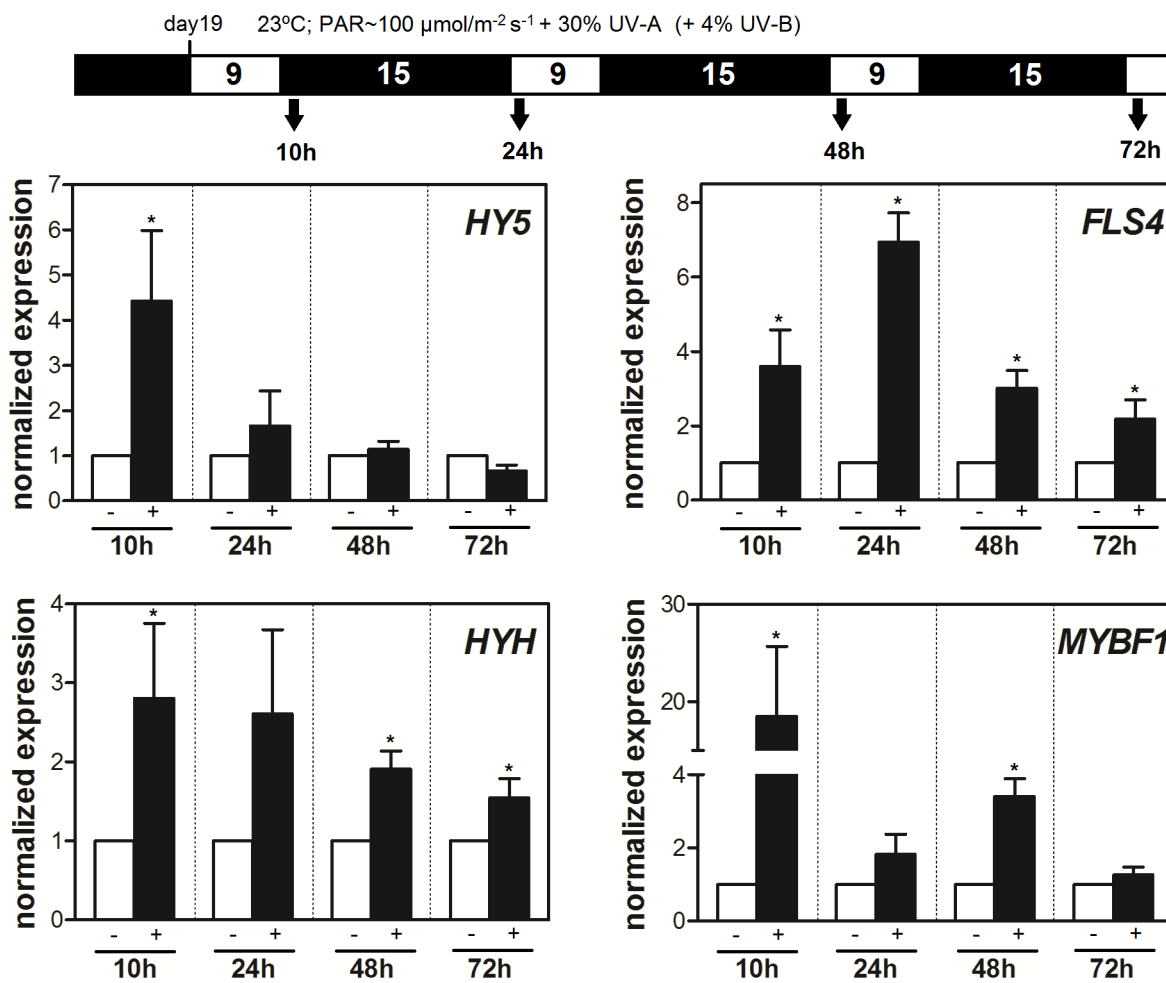

**Figure S11**

**Environmental parameters measured during the UV-B fruit exposure experiments.** Temperature, relative humidity and photosynthetically active radiation (PAR) inside the UV-free greenhouse. Measurements taken during the month of January 2013 (A) and on the 15<sup>th</sup> January (around veraison) from 07.00 h to 23.00 h (B).

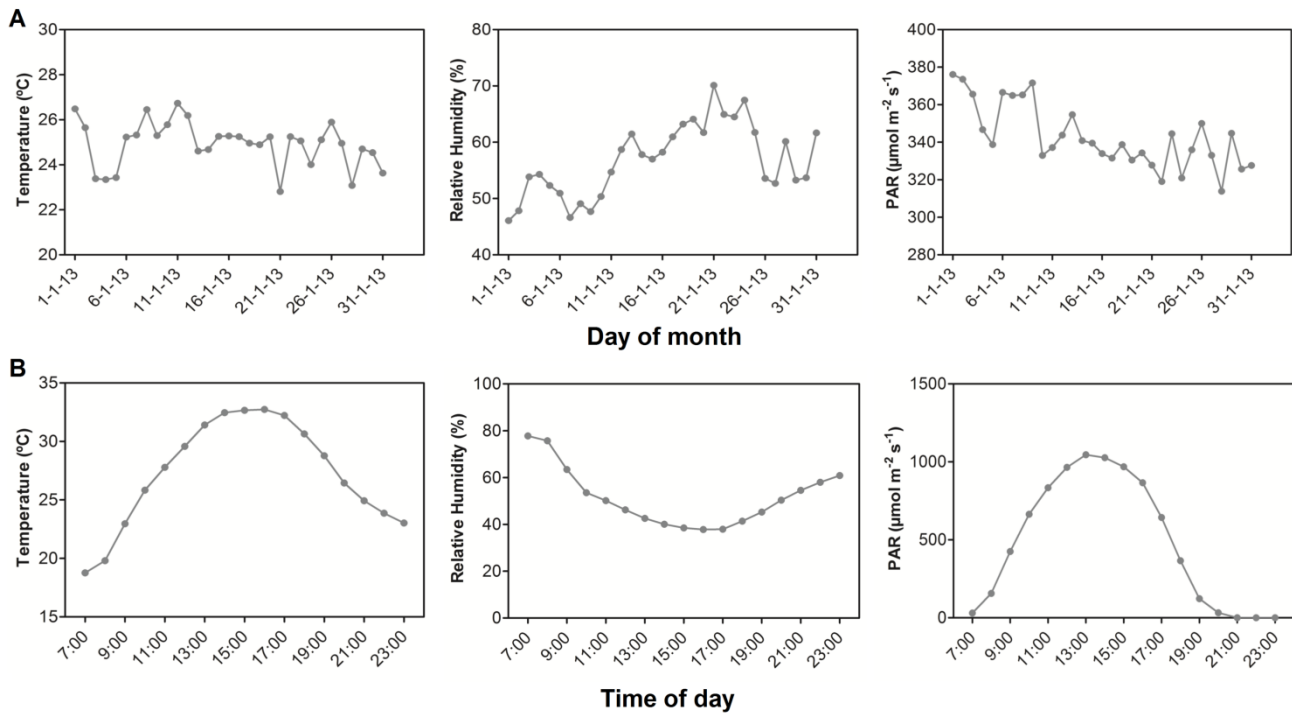

**Figure S12**

**HPLC chromatograms of flavonol analysis for the low UV-B treatment at 9 WAV.** Peaks were identified by absorbance pattern inspection, as seen in the box for peak No. 4.

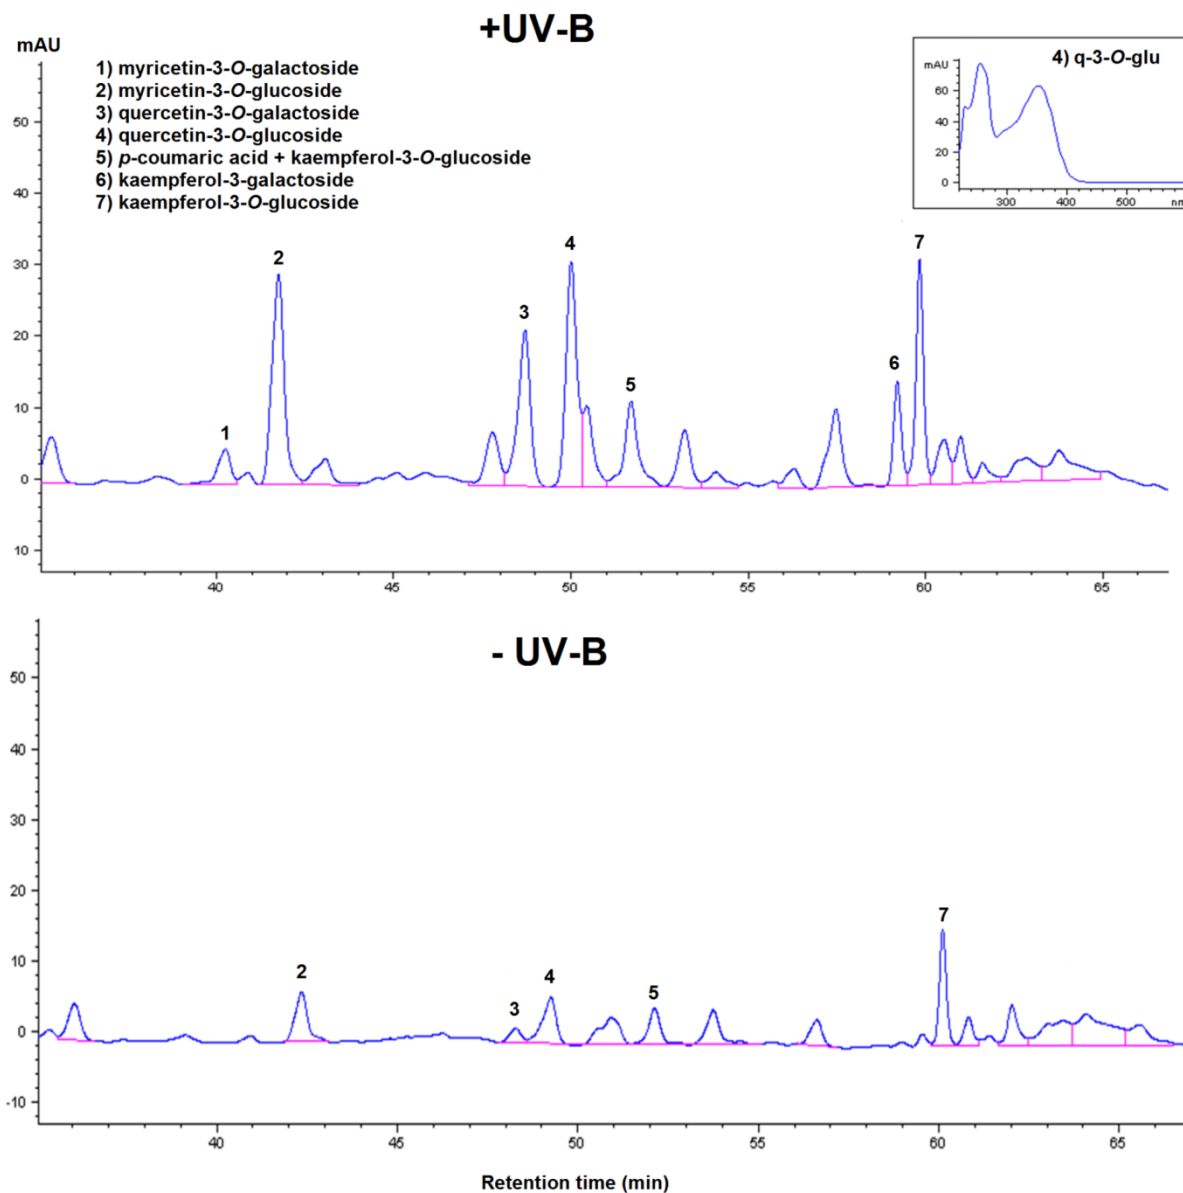

## **Additional References**

**Edgar RC.** 2004. MUSCLE: multiple sequence alignment with high accuracy and high throughput. *Nucleic Acids Research.* **32**, 1792–1797.

**Hardtke CS, Gohda K, Osterlund MT, Oyama T, Okada K, Deng XW.** 2000. HY5 stability and activity in Arabidopsis is regulated by phosphorylation in its COP1 binding domain. *The EMBO Journal* **19**, 4997-5006.

**Osterlund MT, Hardtke CS, Wei N, Deng XW.** 2000. Targeted destabilization of HY5 during light-regulated development of Arabidopsis. *Nature* **405**, 462-466.

**Tamura K, Stecher G, Peterson D, Filipski A, Kumar S.** 2013. MEGA6: Molecular Evolutionary Genetics Analysis Version 6.0. *Molecular Biology and Evolution.* **30**, 2725–2729.
